# Supplementary material for: High-performance hydrogen generation via activated Al–Bi2Se3 composite materials
Source: Royal Society of Chemistry journal article supplement (doi:10.1039/d4nj05117c), 2025-01-01
Supplement: d4nj05117c1.pdf [file d4nj05117c1.pdf]

## Supporting Information for

### High-performance hydrogen generation via activated Al-Bi<sub>2</sub>Se<sub>3</sub> composite materials

Huashuan Lia,<sup>b,\*</sup>, Lumin Liao<sup>b</sup>, Tianhao Zhou<sup>b,c,\*</sup>, kaixiang Ren<sup>c</sup>, Shichang Han<sup>a</sup>, Tianyu Zhu<sup>a,\*</sup>

<sup>a</sup> *College of Mechanical Engineering, Wanjiang University of Technology, Ma'anshan, 243031, P. R. China*

<sup>b</sup> *Guangxi Key Laboratory of Information Materials, Guangxi Collaborative Innovation Center of Structure and Property for New Energy and Materials, School of Material Science and Engineering, Guilin University of Electronic Technology, Guilin, 541004, P. R. China*

<sup>c</sup> *College of Materials Engineering and Science, Anhui University of Technology, Ma'anshan, 243002, P. R. China*

\* Corresponding authors:

E-mail: lihuashuan@126.com.

## S1 Repeat experiments

Al-15 wt%  $\text{Bi}_2\text{Se}_3$  samples were subjected to repeatability testing. The samples were prepared with a ball milling time of 5 h and a ball-to-material ratio of 45:1. The test results indicate that each experiment involving  $\text{Bi}_2\text{Se}_3$  should be conducted at least three times to ensure the accuracy of the results. The average absolute error was maintained within 3%.

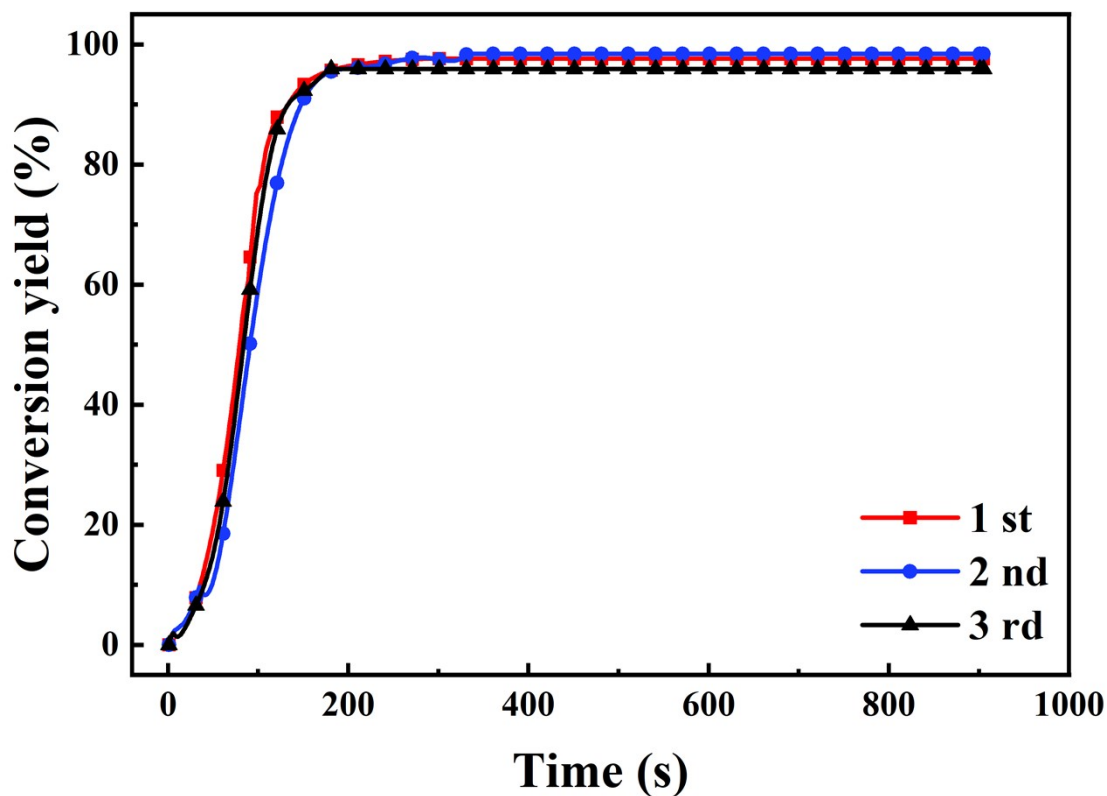

Fig. S1. Hydrogen Conversion Curves for Repeatability Testing of Al-15 wt%  $\text{Bi}_2\text{Se}_3$  Samples.
